# Supplementary material for: Low surface energy interface-derived low-temperature recrystallization behavior of organic thin films for boosting carrier mobility
Source: Royal Society of Chemistry journal article supplement (doi:10.1039/c9tc05043d), 2019-01-01
Supplement: c9tc05043d1.pdf [file c9tc05043d1.pdf]

## **Electronic Supplementary Information**

### **Low surface energy interface-derived low-temperature recrystallization behavior of organic thin film for boosting carrier mobility**

Shuya Wang, Zhan Wei, Yahan Yang, Xiaoli Zhao,\* Qingxin Tang,\* Yanhong Tong,\*  
Yichun Liu

Center for Advanced Optoelectronic Functional Materials Research, and Key Laboratory of  
UV-Emitting Materials and Technology of Ministry of Education, Northeast Normal  
University, 5268 Renmin Street, Changchun 130024, China.

\*E-mail: [tangqx@nenu.edu.cn](mailto:tangqx@nenu.edu.cn), [zhaoxl326@nenu.edu.cn](mailto:zhaoxl326@nenu.edu.cn), [tongyh@nenu.edu.cn](mailto:tongyh@nenu.edu.cn)

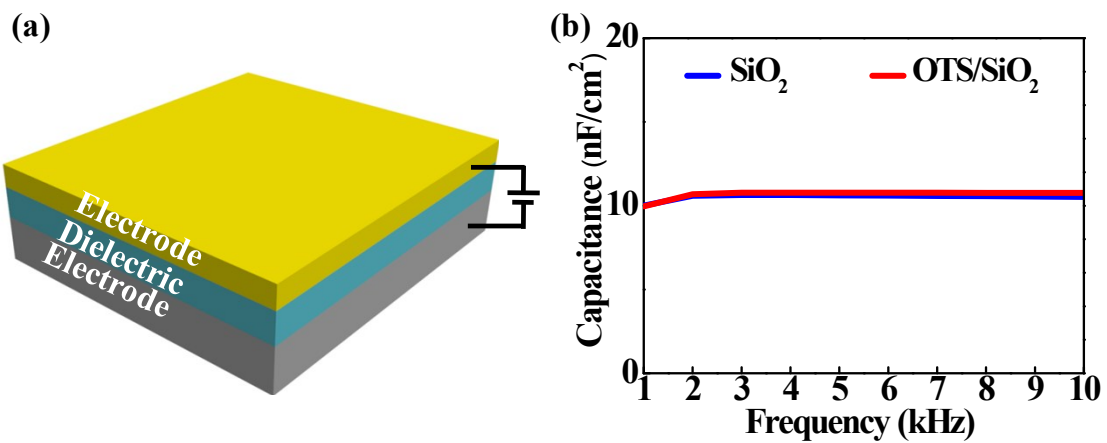

**Fig. S1** (a) Schematic diagram of capacitance measurement. (b) Capacitance-frequency curve ( $C$ - $F$ ) for the dielectric. Capacitances of SiO<sub>2</sub> and OTS/SiO<sub>2</sub> are approximately 10 nF cm<sup>-2</sup>.

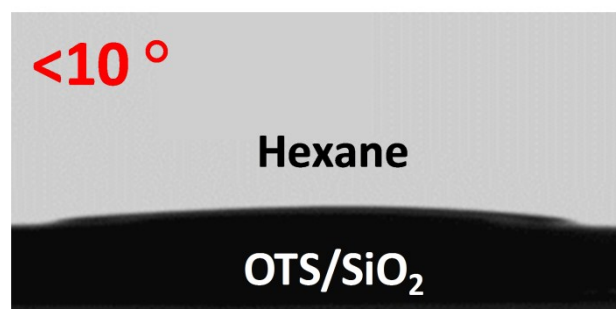

**Fig. S2** Contact angle of hexane on the OTS/SiO<sub>2</sub> dielectric layer.

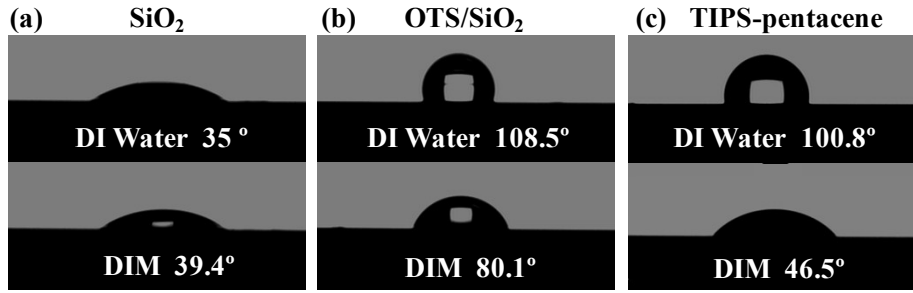

**Fig. S3** Contact angle of deionized (DI) water and diiodomethane (DIM) on different dielectrics and TIPS-pentacene thin film. (a) SiO<sub>2</sub>; (b) OTS/SiO<sub>2</sub>; (c) TIPS-pentacene thin film.

The polar component ( $\gamma^p$ ) and dispersive component ( $\gamma^d$ ) of surface energy were counted to solve two simultaneous equations. The total surface energy ( $\gamma^S$ ) was counted from the sum of these components.<sup>S1</sup>

$$1 + \cos \theta = \frac{2\sqrt{\gamma^d}\sqrt{\gamma_{lv}^d}}{\gamma_{lv}} + \frac{2\sqrt{\gamma^p}\sqrt{\gamma_{lv}^p}}{\gamma_{lv}} \quad (1)$$

Diiodomethane (DIM) and deionized (DI) water were used as test liquids. Measurement results of the surface energy of dielectrics and TIPS-pentacene thin film are shown in Table S1.

Table S1 Contact angle and surface energy data for different dielectrics and TIPS-pentacene thin film.

| Dielectrics and semiconductor | Contact angles (degree) avg. $\pm$ avg. dev |                | Surface energy (mJ m <sup>-2</sup> ) avg. $\pm$ avg. dev |                 |                |
|-------------------------------|---------------------------------------------|----------------|----------------------------------------------------------|-----------------|----------------|
|                               | DI Water                                    | DIM            | $\gamma^p$                                               | $\gamma^d$      | $\gamma^S$     |
| SiO <sub>2</sub>              | 35.5 $\pm$ 0.7                              | 39.4 $\pm$ 0.3 | 26.2 $\pm$ 0.3                                           | 39.9 $\pm$ 0.1  | 66.1 $\pm$ 0.4 |
| OTS/SiO <sub>2</sub>          | 108.5 $\pm$ 0.4                             | 80.3 $\pm$ 0.6 | 0.6 $\pm$ 0.07                                           | 17.3 $\pm$ 0.3  | 17.9 $\pm$ 0.2 |
| TIPS-pentacene                | 100.9 $\pm$ 0.4                             | 46.0 $\pm$ 0.8 | 0.04 $\pm$ 0.01                                          | 36.46 $\pm$ 0.4 | 36.5 $\pm$ 0.4 |

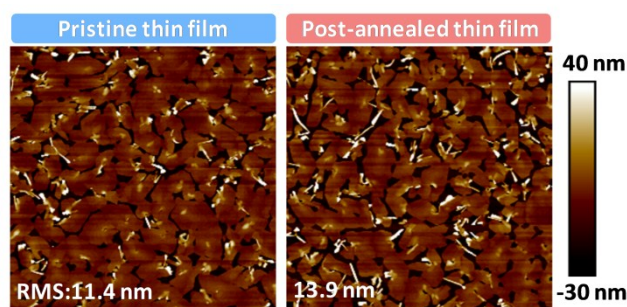

**Fig. S4** AFM images ( $20\ \mu\text{m} \times 20\ \mu\text{m}$ ) of vacuum-deposited TIPS-pentacene thin films on a low surface energy OTS/SiO<sub>2</sub> dielectric layer before and after post-annealing treatment.

Fig. S4 shows AFM images of vacuum-deposited TIPS-pentacene thin films on a low surface energy OTS/SiO<sub>2</sub> dielectric layer before and after post-annealing treatment. 20 nm TIPS-pentacene thin films was deposited directly on the OTS/SiO<sub>2</sub> dielectric layer by vacuum thermal evaporation at a rate of ca.  $0.1\ \text{\AA}\ \text{s}^{-1}$  at a substrate temperature of  $70\ ^\circ\text{C}$ . The post-annealing condition is fixed at  $40\ ^\circ\text{C}$  for 15 min. It can be obviously observed that the morphology of the TIPS-pentacene thin film is almost no change after the post-annealing treatment. It can be ascribed that the morphology of vacuum-deposited TIPS-pentacene thin film is stable, while the morphology of solution-processed TIPS-pentacene thin film is metastable.<sup>S2,S3</sup>

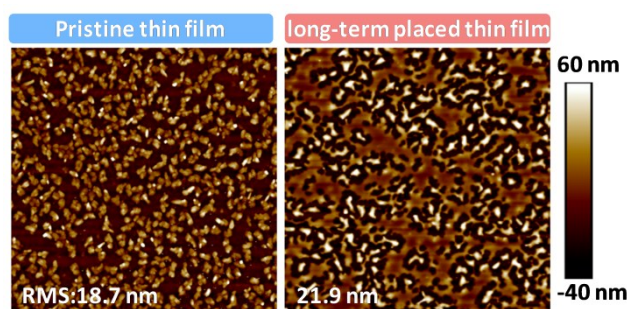

**Fig. S5** AFM images ( $20\ \mu\text{m} \times 20\ \mu\text{m}$ ) of solution-processed TIPS-pentacene thin films on a low surface energy OTS/SiO<sub>2</sub> dielectric before and after long-term placement.

Fig. S5 shows AFM images of spin-coated TIPS-pentacene thin films on a low surface energy OTS/SiO<sub>2</sub> dielectric layer before and after long-term placement. It can be observed that TIPS-pentacene thin films before and after long-term placement present rather different morphology, while the morphology after long-term placement is not improved. The RMS of TIPS-pentacene thin films after long-term placement increases to 21.9 nm. Therefore, after long-term placement, TIPS-pentacene thin film on the OTS/SiO<sub>2</sub> dielectric layer can recrystallize, but does not become smooth. It can be attributed to the fact that TIPS-pentacene molecules can move at room temperature,<sup>S4</sup> but the small kinetic energy can not move TIPS-pentacene molecules to the appropriate distance, thus failing to form the smooth TIPS-pentacene thin film.

## REFERENCES

- S1 D. K. Owens and R. C. Wendt, *Journal of Applied Polymer Science*, 1969, 13, 1741-1747.
- S2 Y. Yuan, G. Giri, A. L. Ayzner, A. P. Zoombelt, S. C. B. Mannsfeld, J. Chen, D. Nordlund, M. F. Toney, J. Huang and Z. Bao, *Nat. Commun.*, 2014, 5, 3005.
- S3 E. Treossi, A. Liscio, X. Feng, V. Palermo, K. Mullen and P. Samori, *Small*, 2009, 5, 112-119.
- S4 A. Troisi, G. Orlandi and J. E. Anthony, *Chem. Mater.*, 2005, 17, 5024-5031.
